# Supplementary material
Source: PubMed Central journal article supplement (PMC2773134)
Supplement: NIHMS148481-supplement-supp__info.pdf [file NIHMS148481-supplement-supp__info.pdf]

## Supporting Information

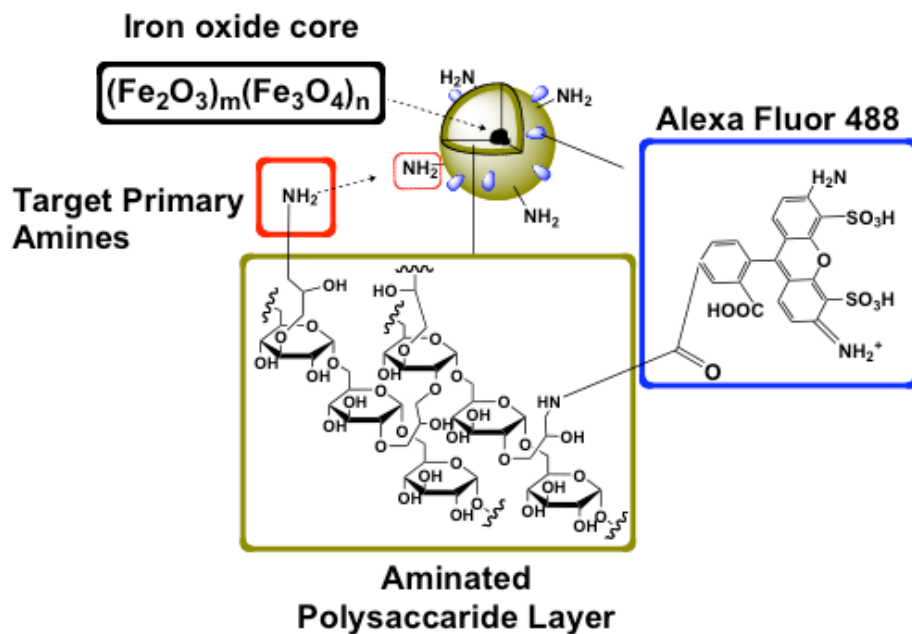

**Supplementary Figure 1.** Schematic of the nanoparticle scaffold used to design the MPO/ROS sensor. Fluorogenic oxazine compounds were reacted with primary amines present on the nanoparticle surface as described in the text.
